# Supplementary material
Source: PubMed Central journal article supplement (PMC8404396)
Supplement: NIHMS1720556-supplement-1720556_Sup_info.pdf [file NIHMS1720556-supplement-1720556_Sup_info.pdf]

Table S1. FACS antibodies.

| <b>Immune Marker</b> | <b>Fluorophore</b> | <b>Clone</b> |
|----------------------|--------------------|--------------|
| CD45                 | perCP/Cy5.5        | 30-F11       |
| CD3                  | AF700              | 17A2         |
| CD8                  | BV421              | 53-6.7       |
| CD4                  | BV650              | GK1.5        |
| CD25                 | APC                | PC61         |
| FOXP3                | PE                 | 150D         |
| PD1                  | PE-Cy7             | 29F.1A12     |
| Tim3                 | PE                 | RMT3-23      |
| Ki67                 | BV605              | 16A8         |
| CD11c                | FITC               | HL3          |
| IA/IE                | BV650              | M5/114.15.2  |
| CD11b                | AF700              | M1/70        |
| Ly6C                 | APC                | HK1.4        |
| Ly6G                 | PE                 | 1A8          |
| CD64                 | PE-Cy7             | X54-5/7.1    |
| PD-L1                | BV421              | 29E.2A3      |
| Zombie NIR           |                    |              |



Fig S1

A

KP

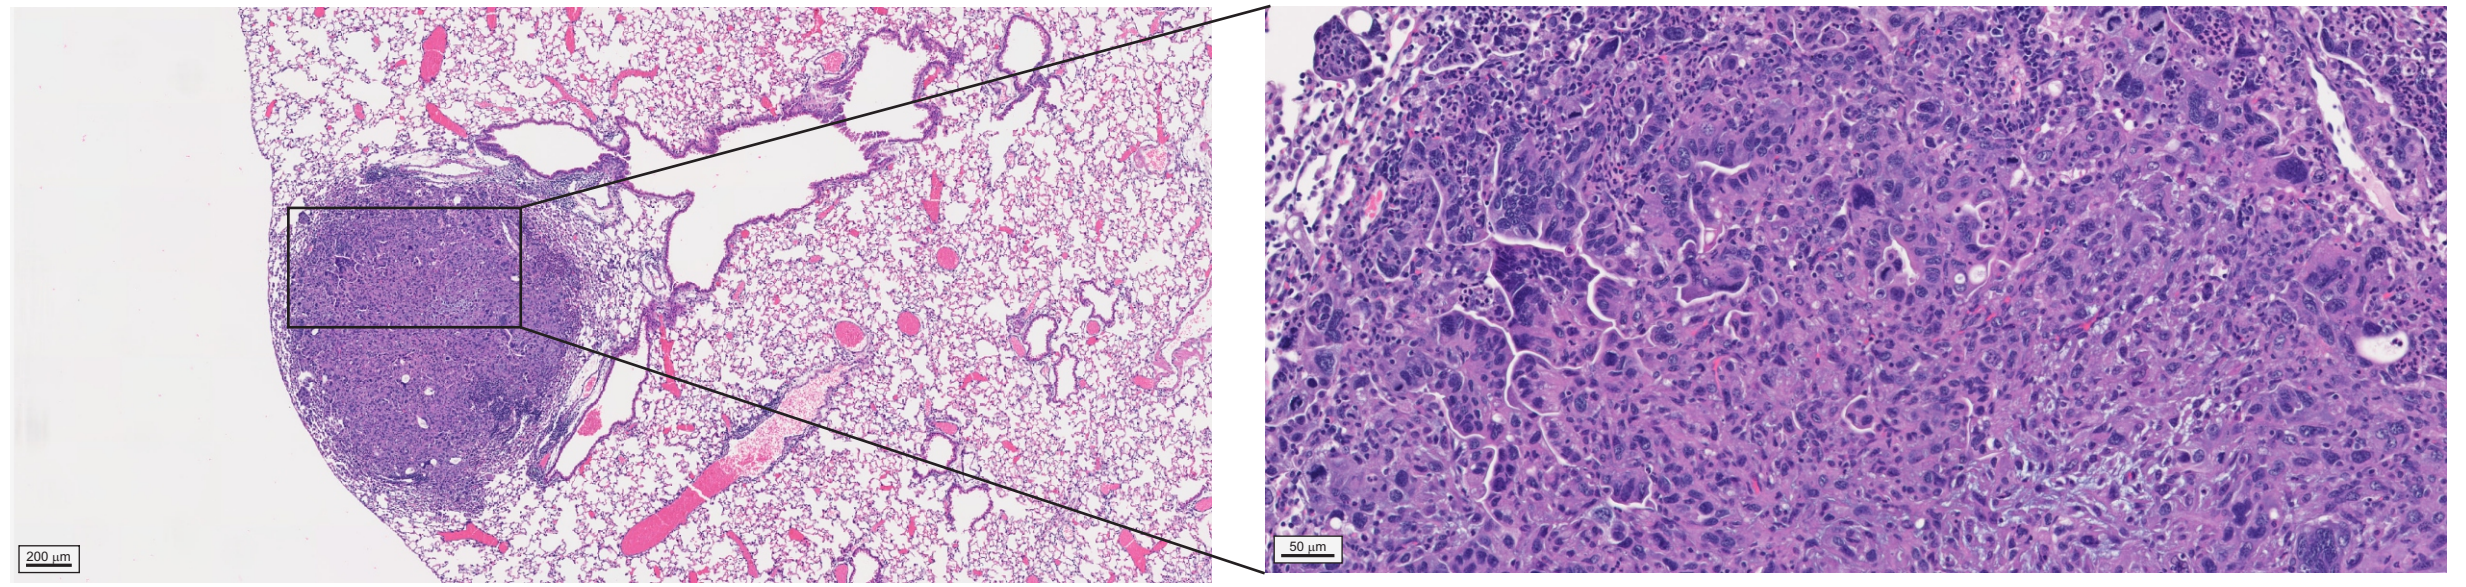

B

KPL

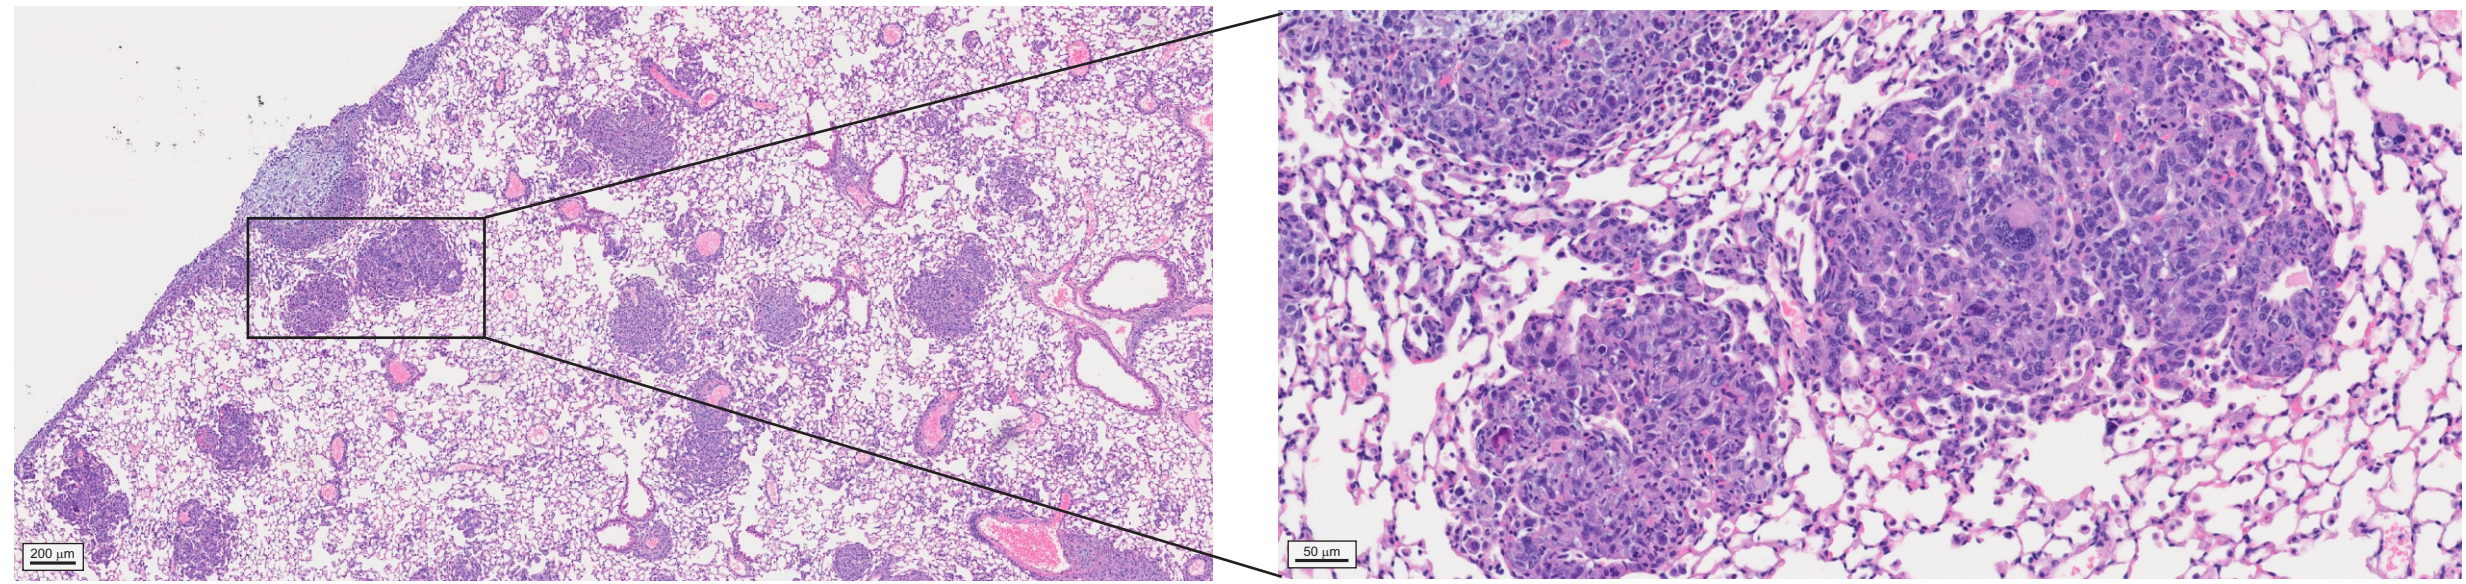



Fig S2

A

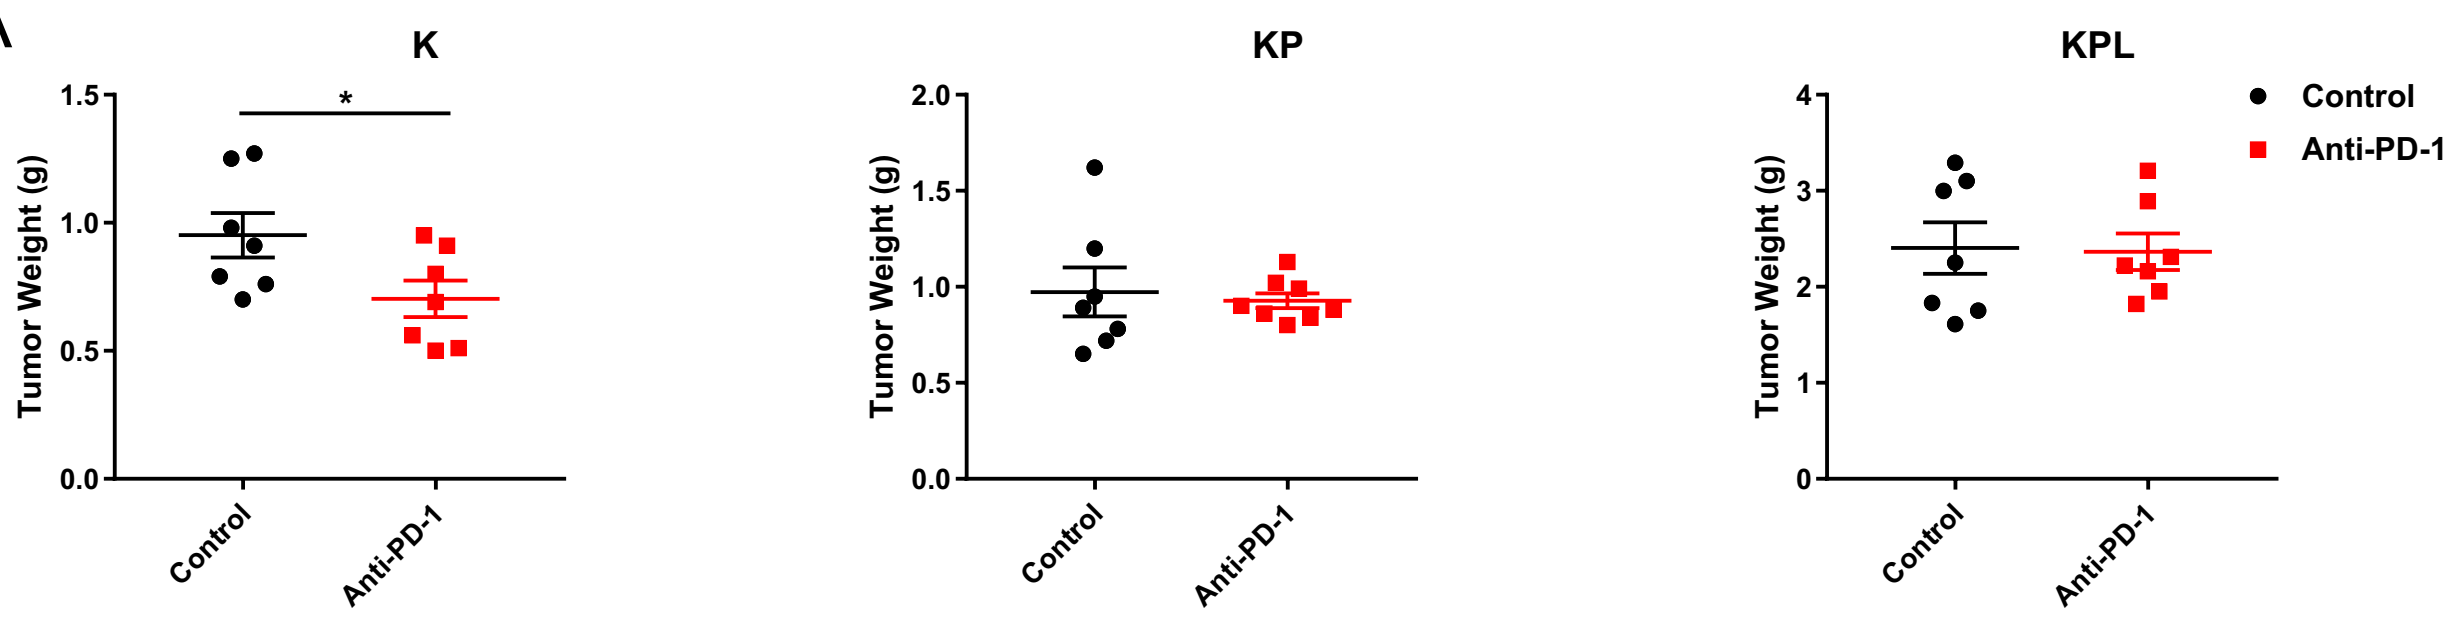

B

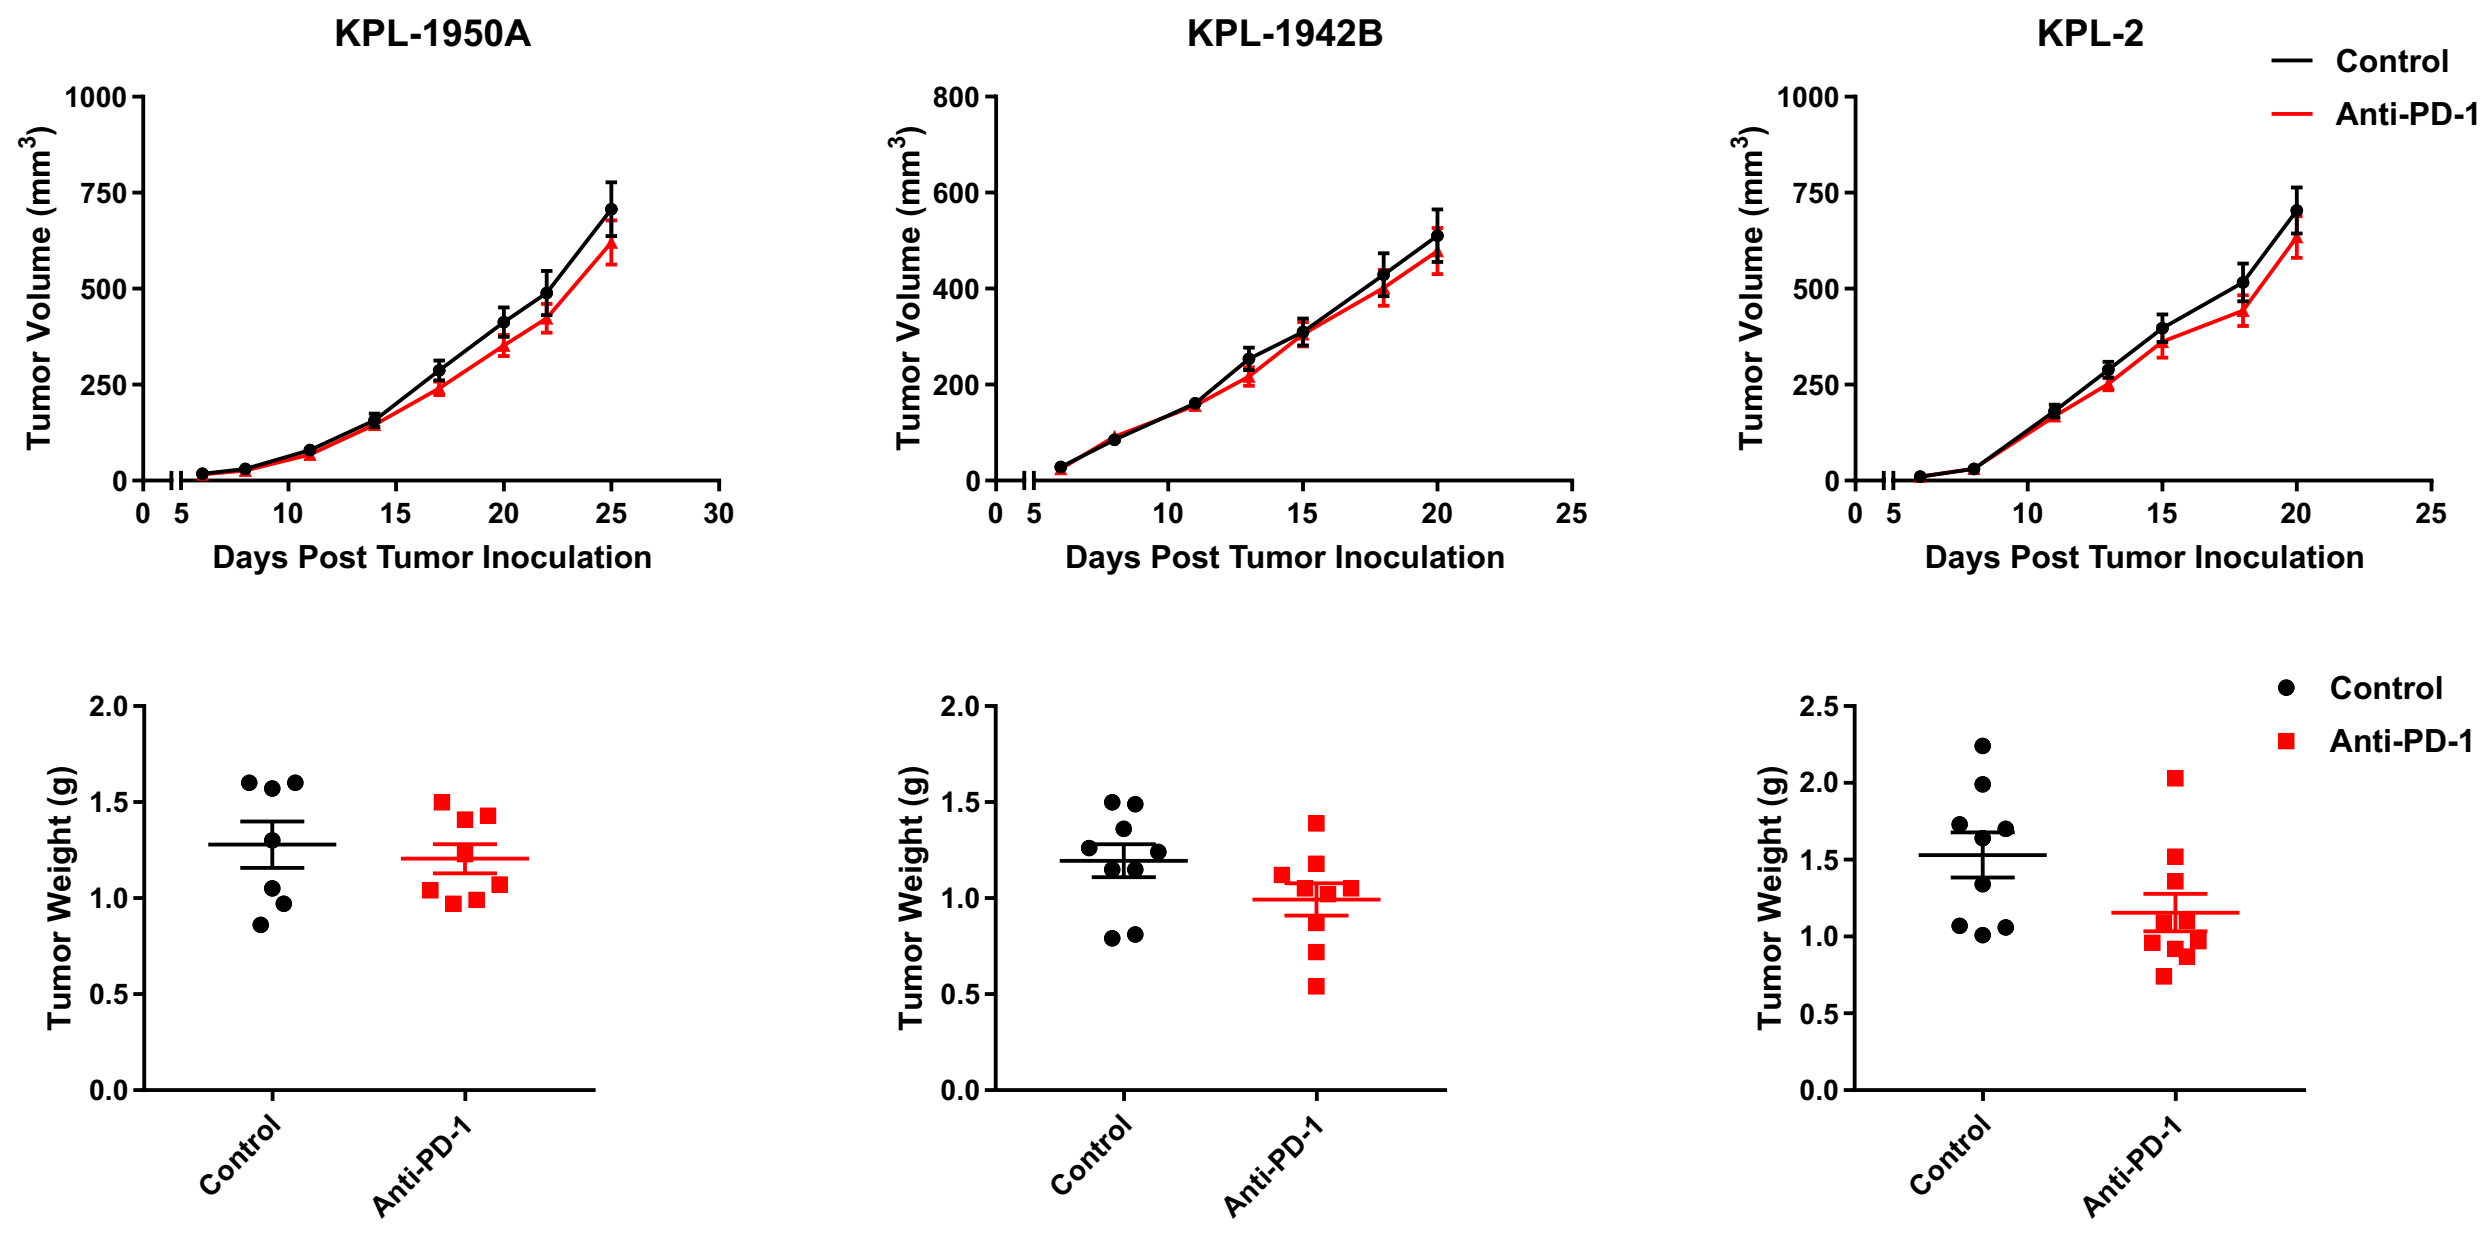

C

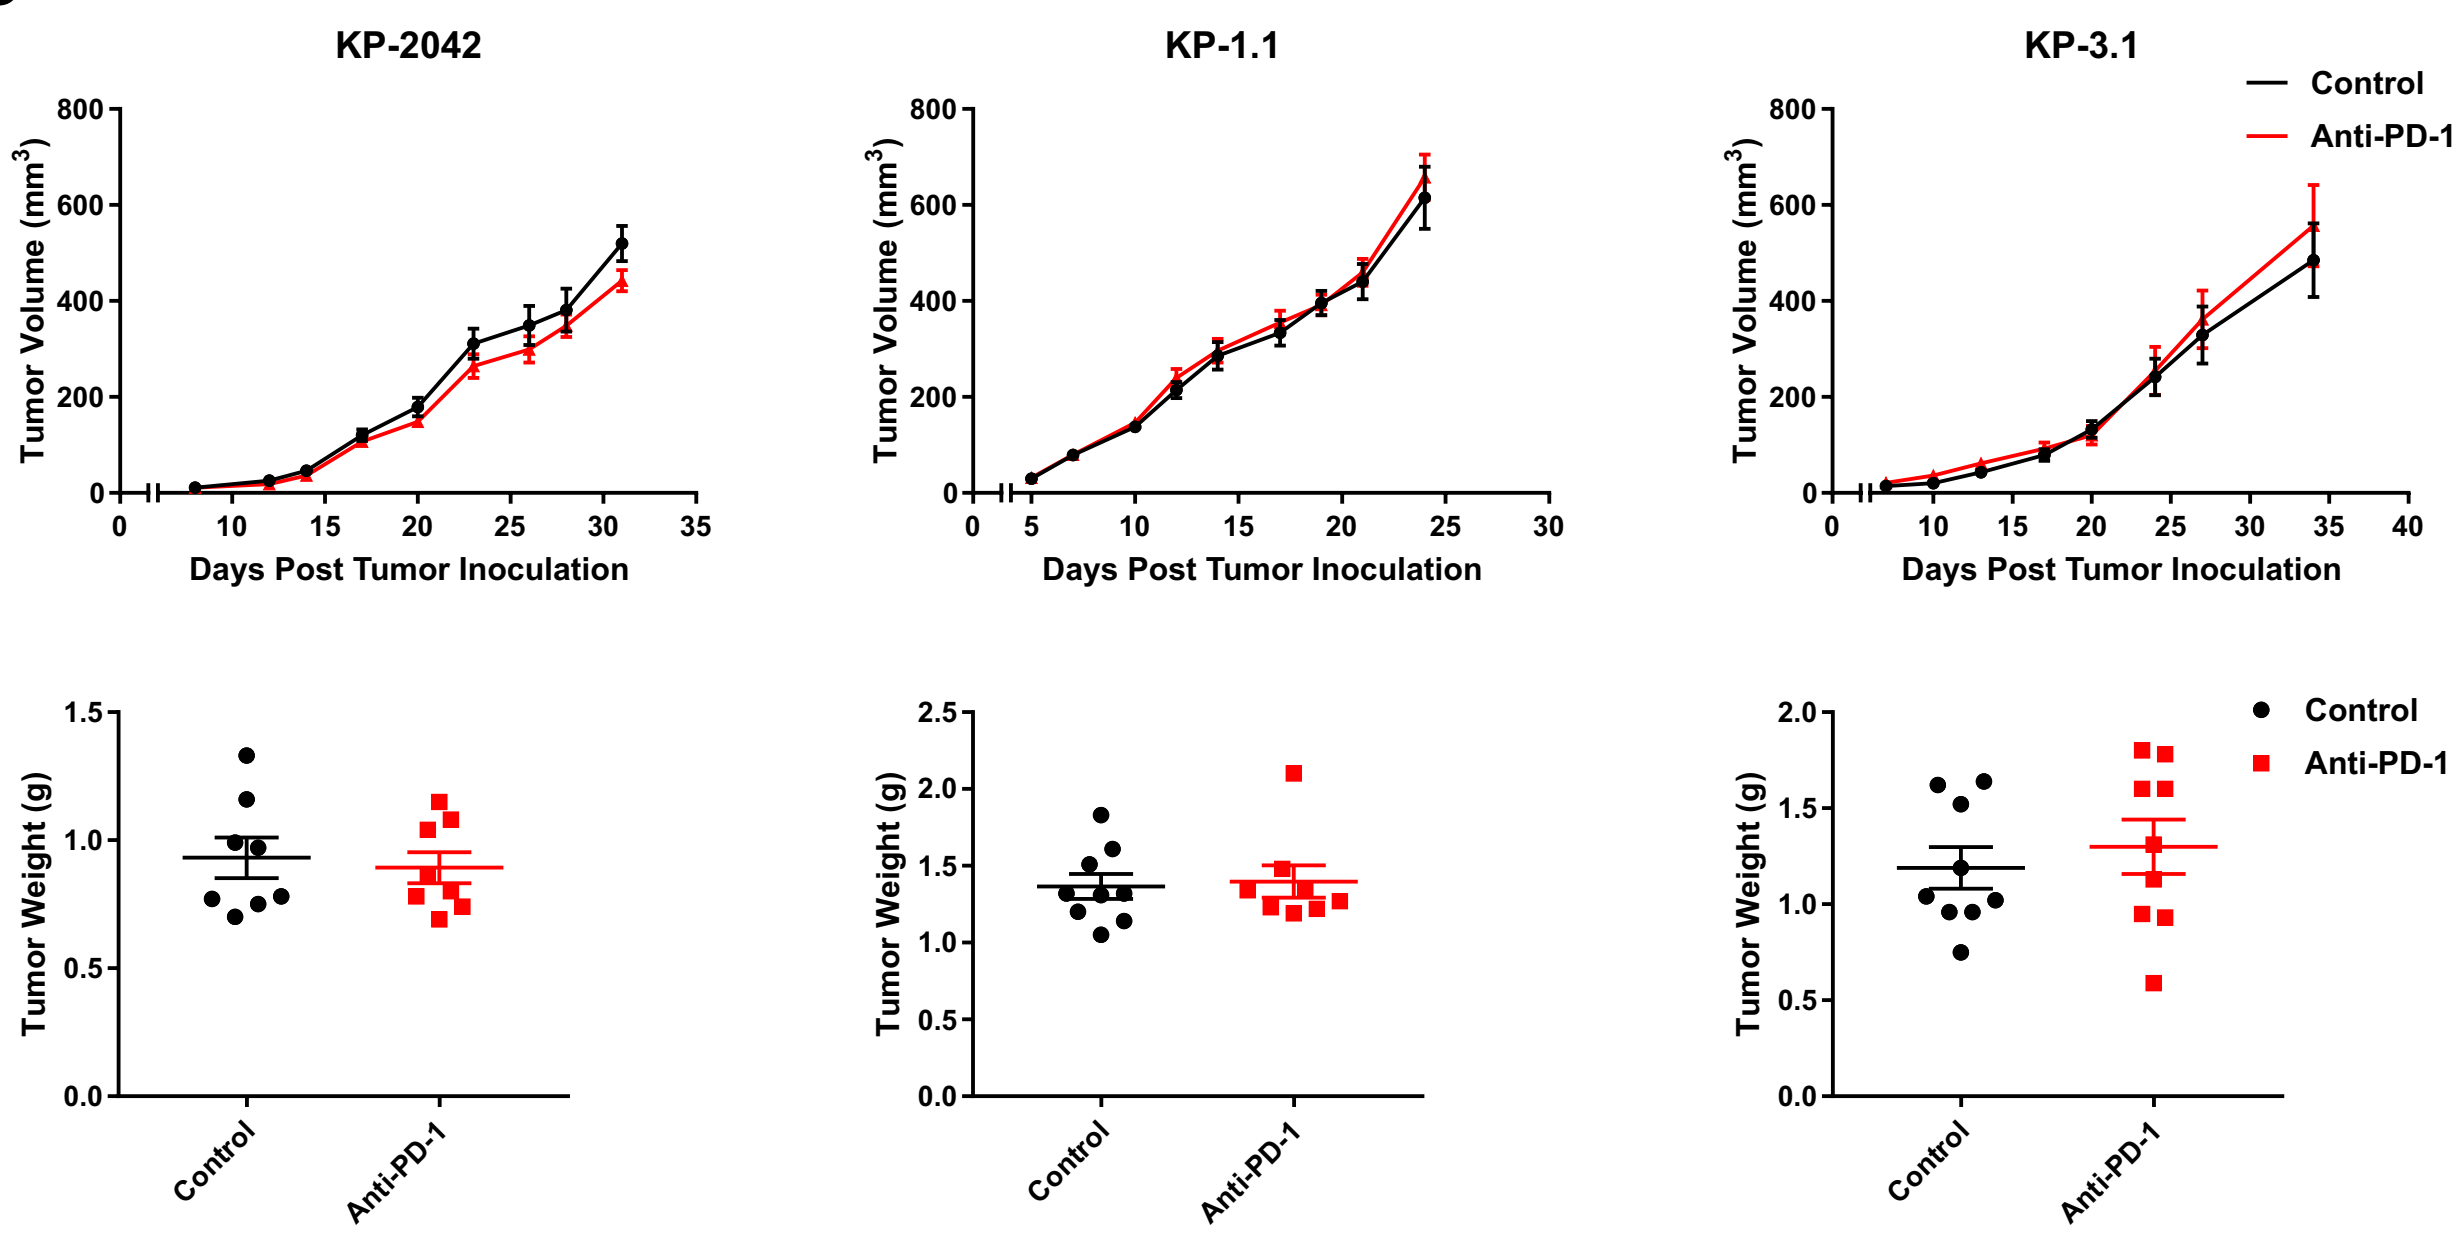

Fig S2

D

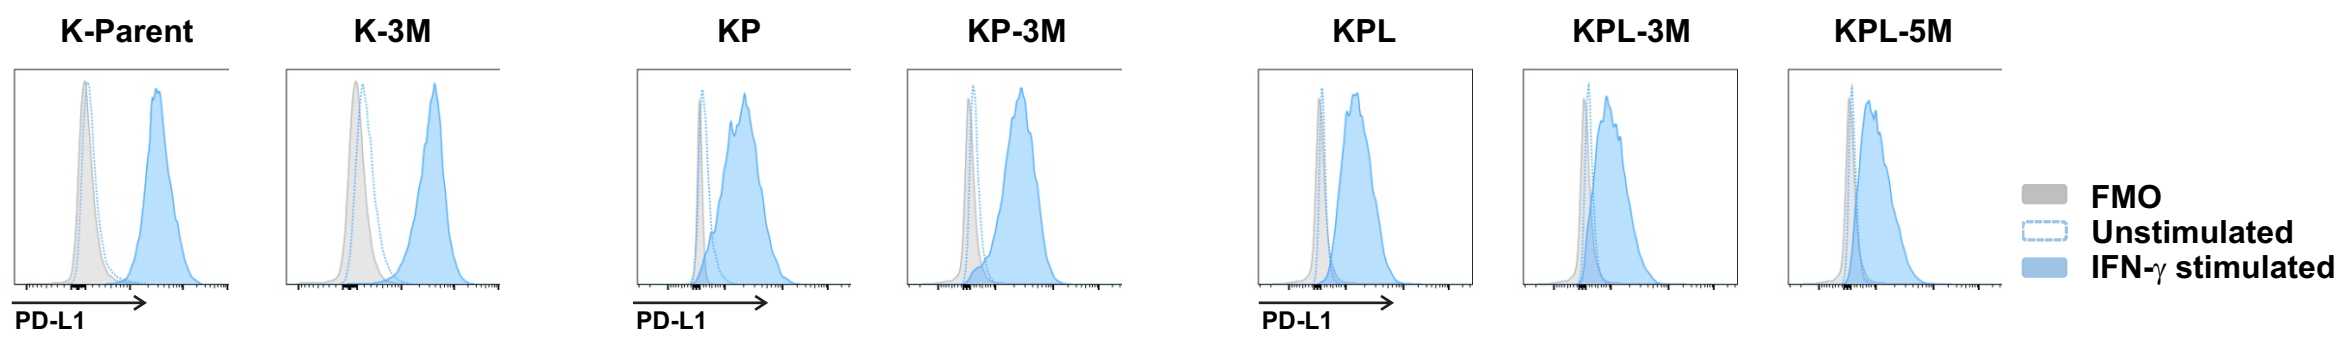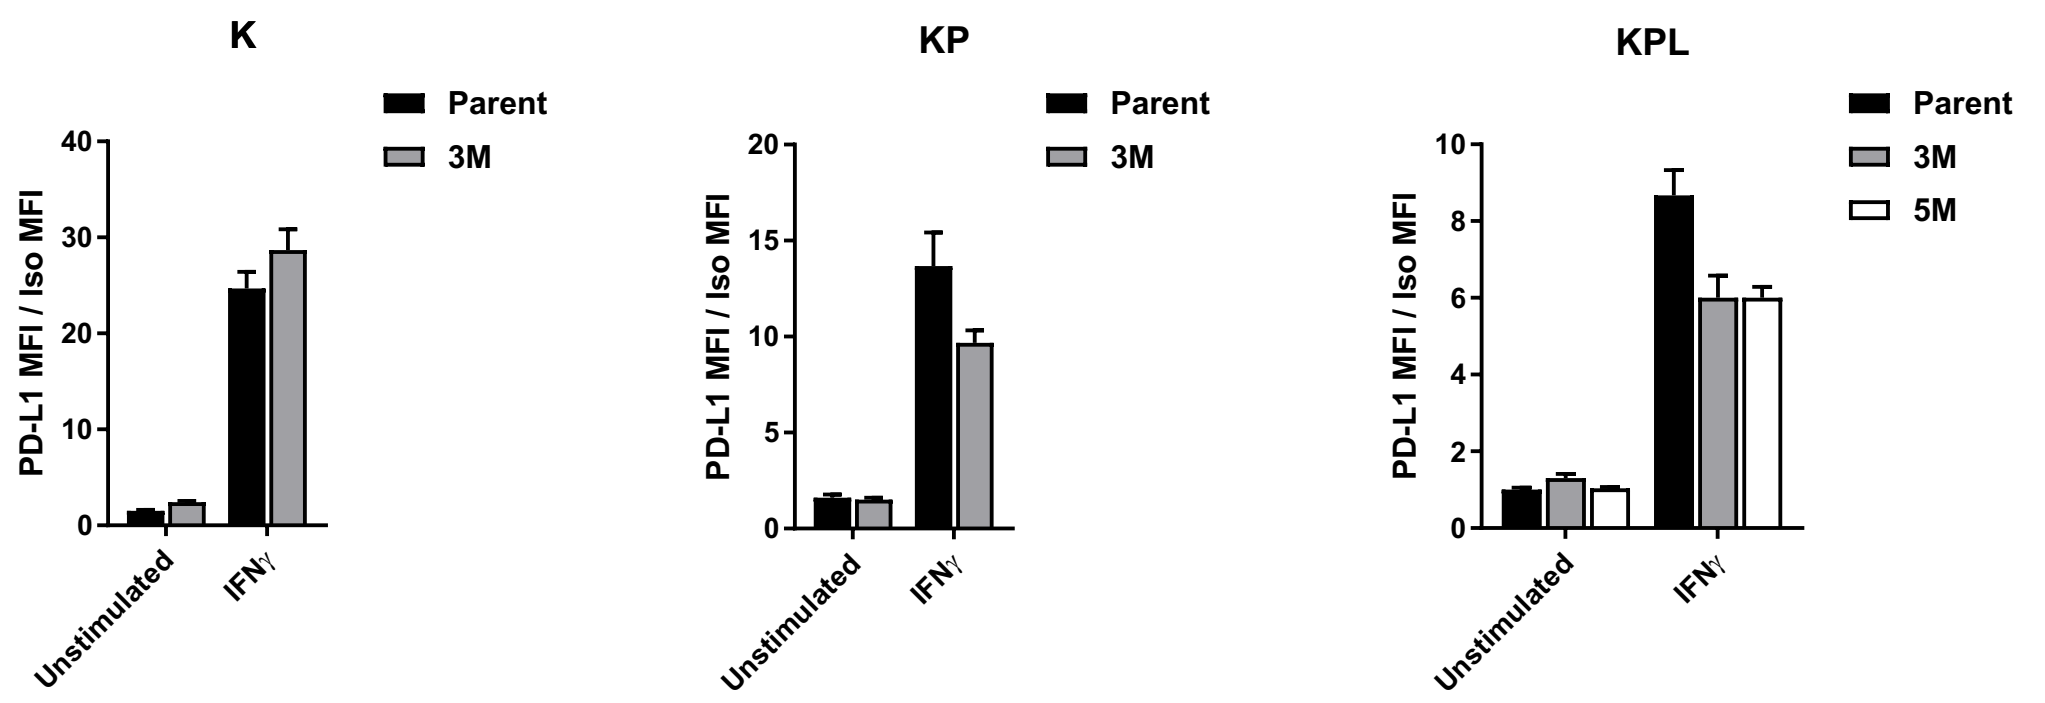

Fig S3

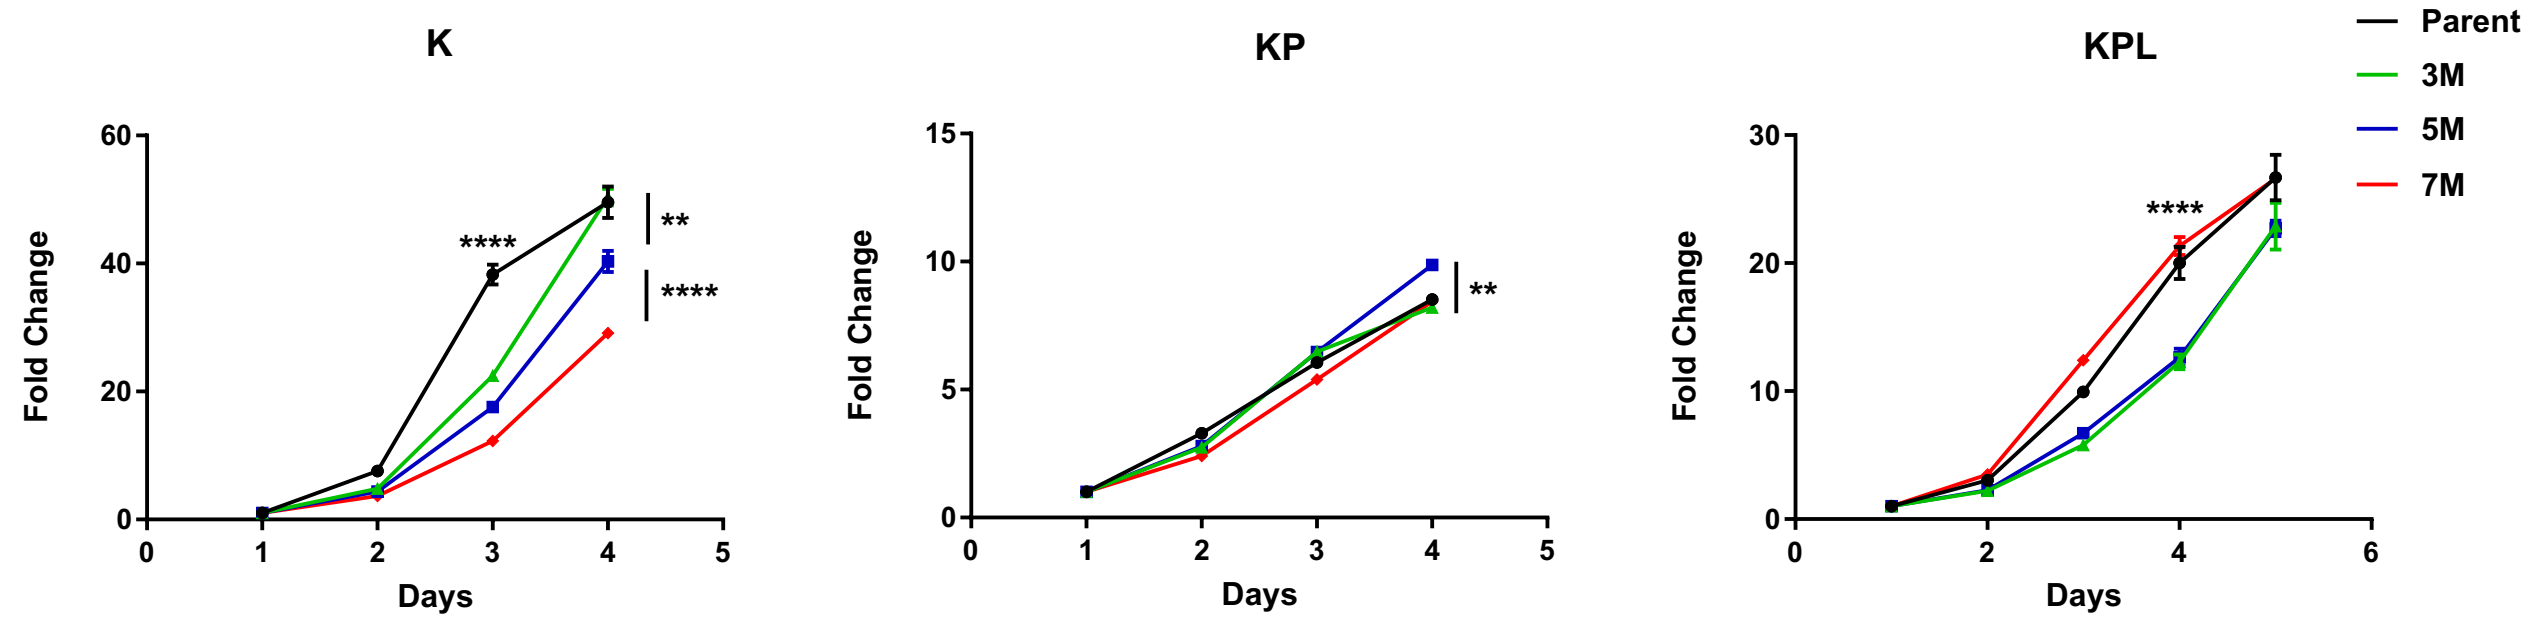

Fig S4

A

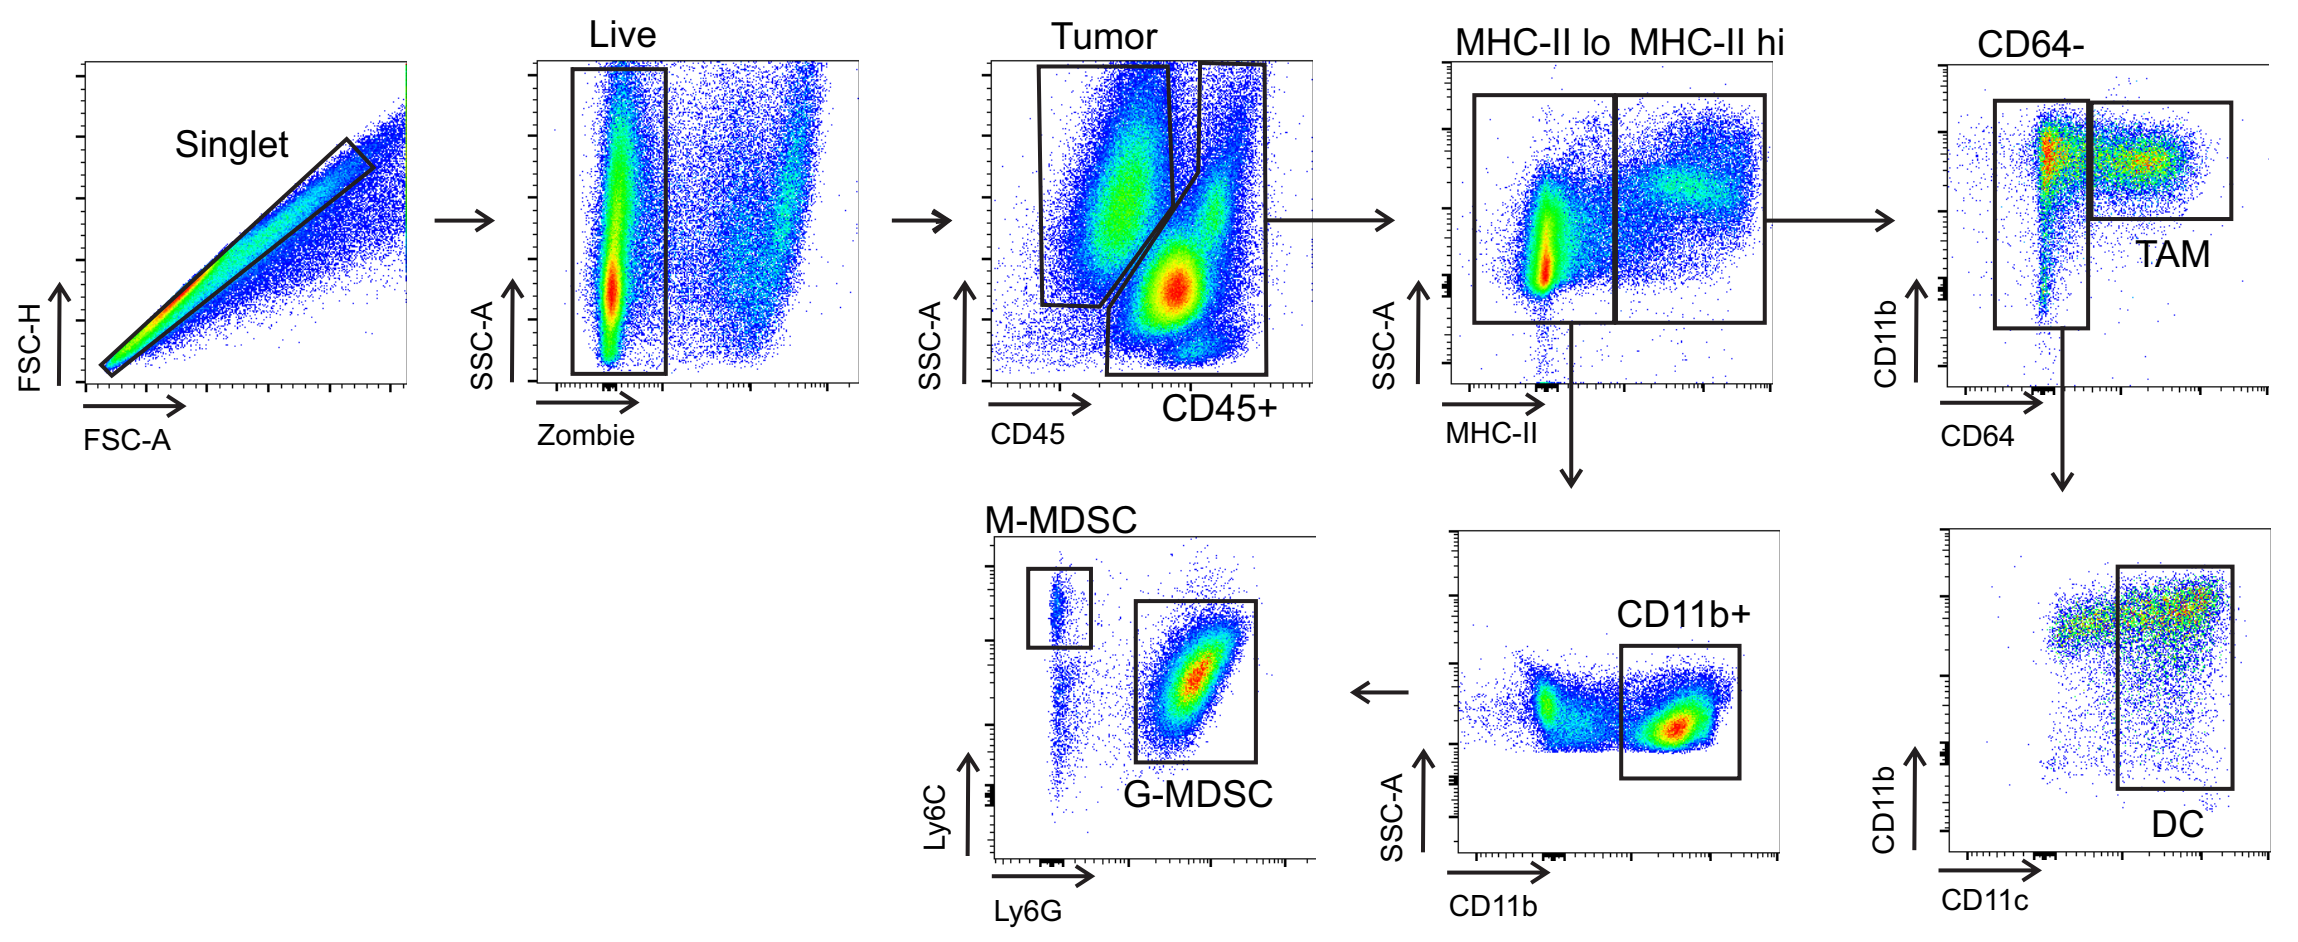

B

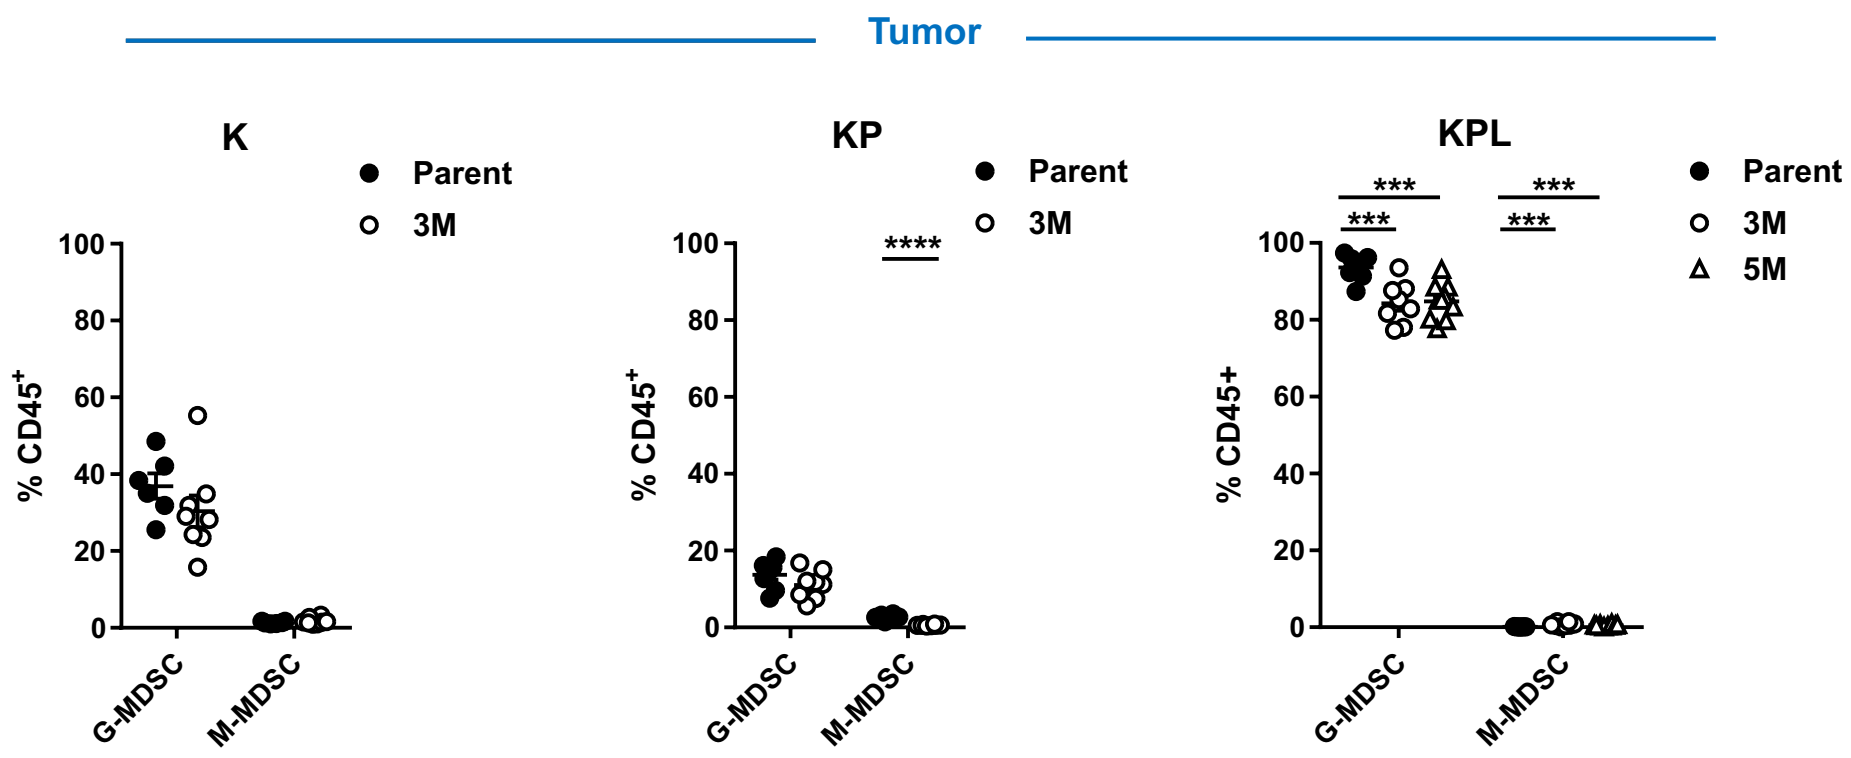

C

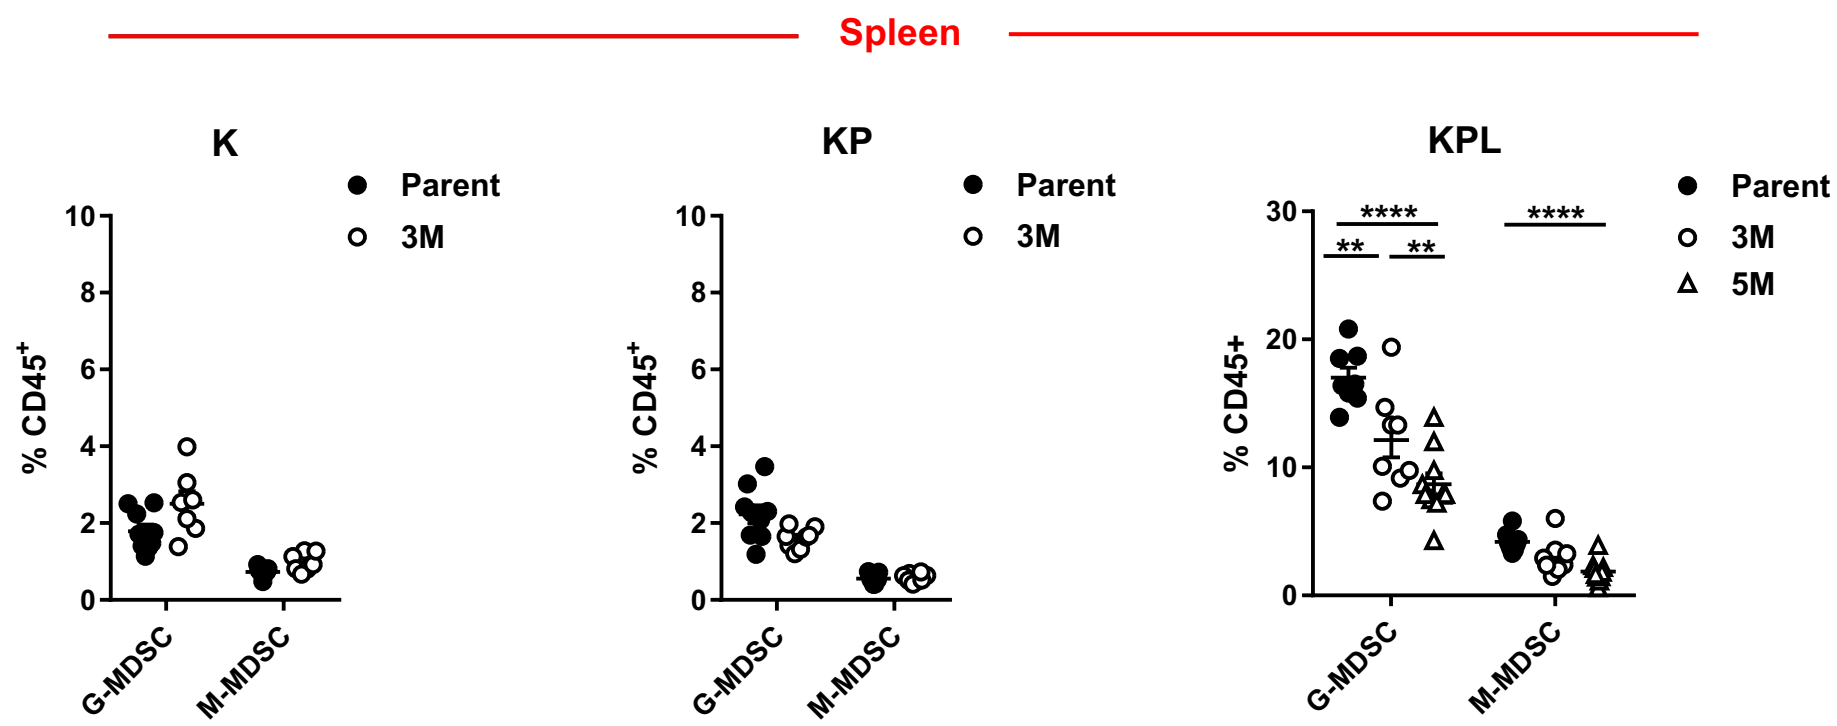

Fig S5

A

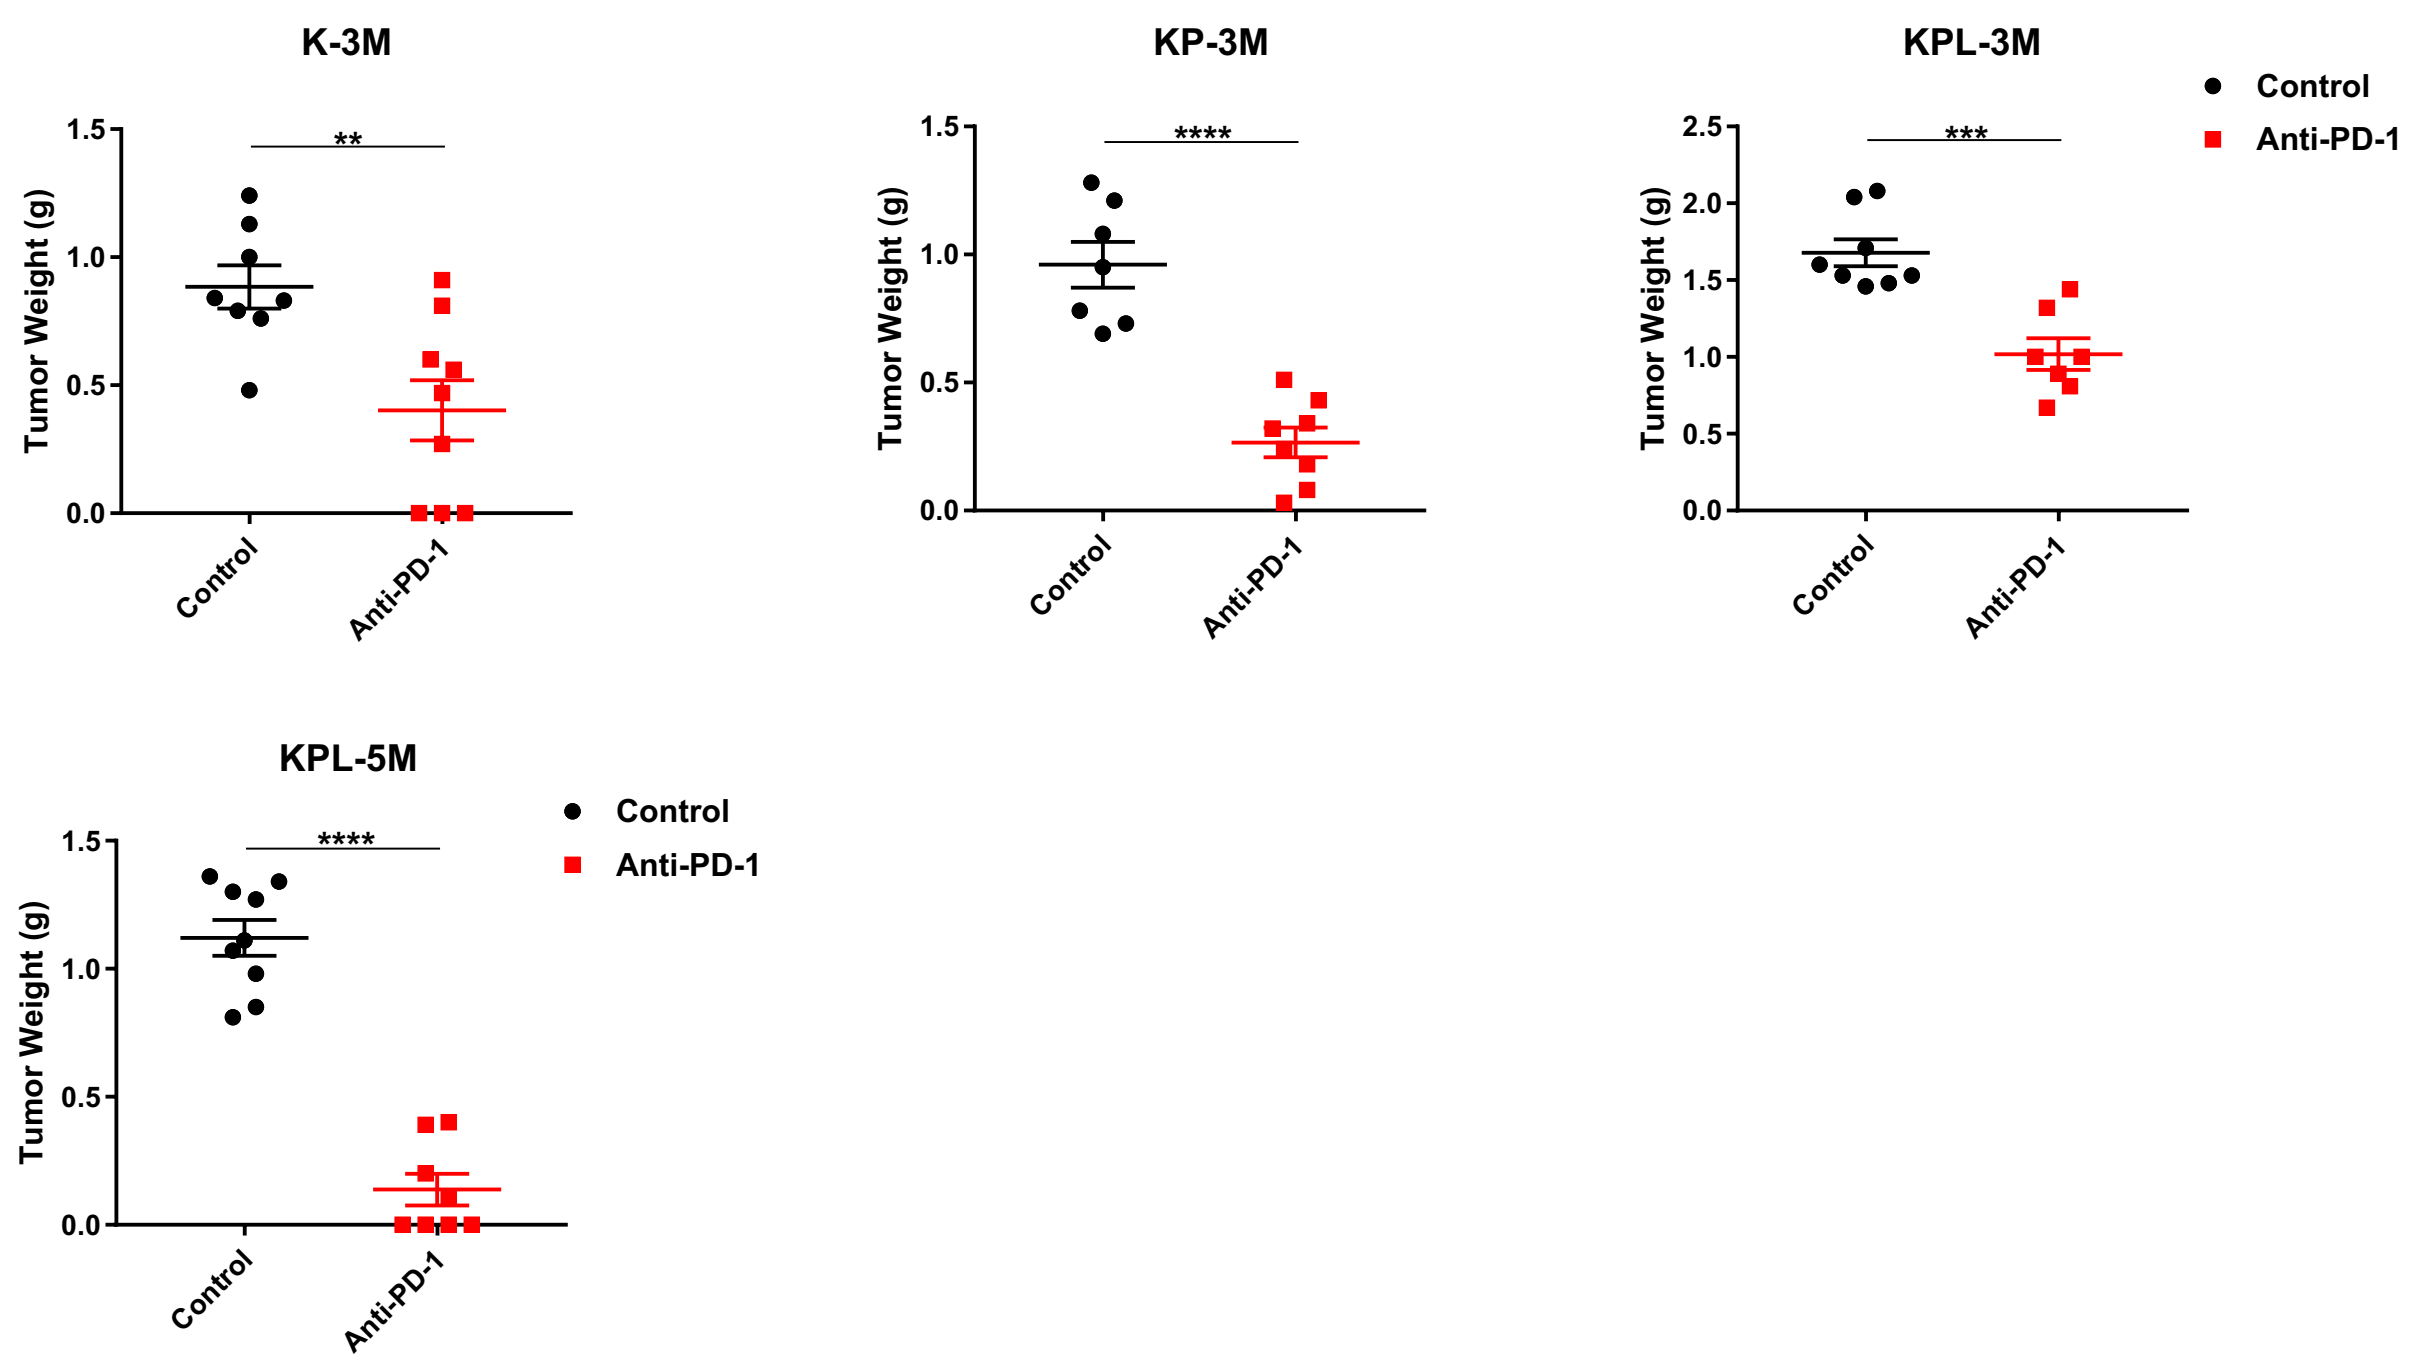

B

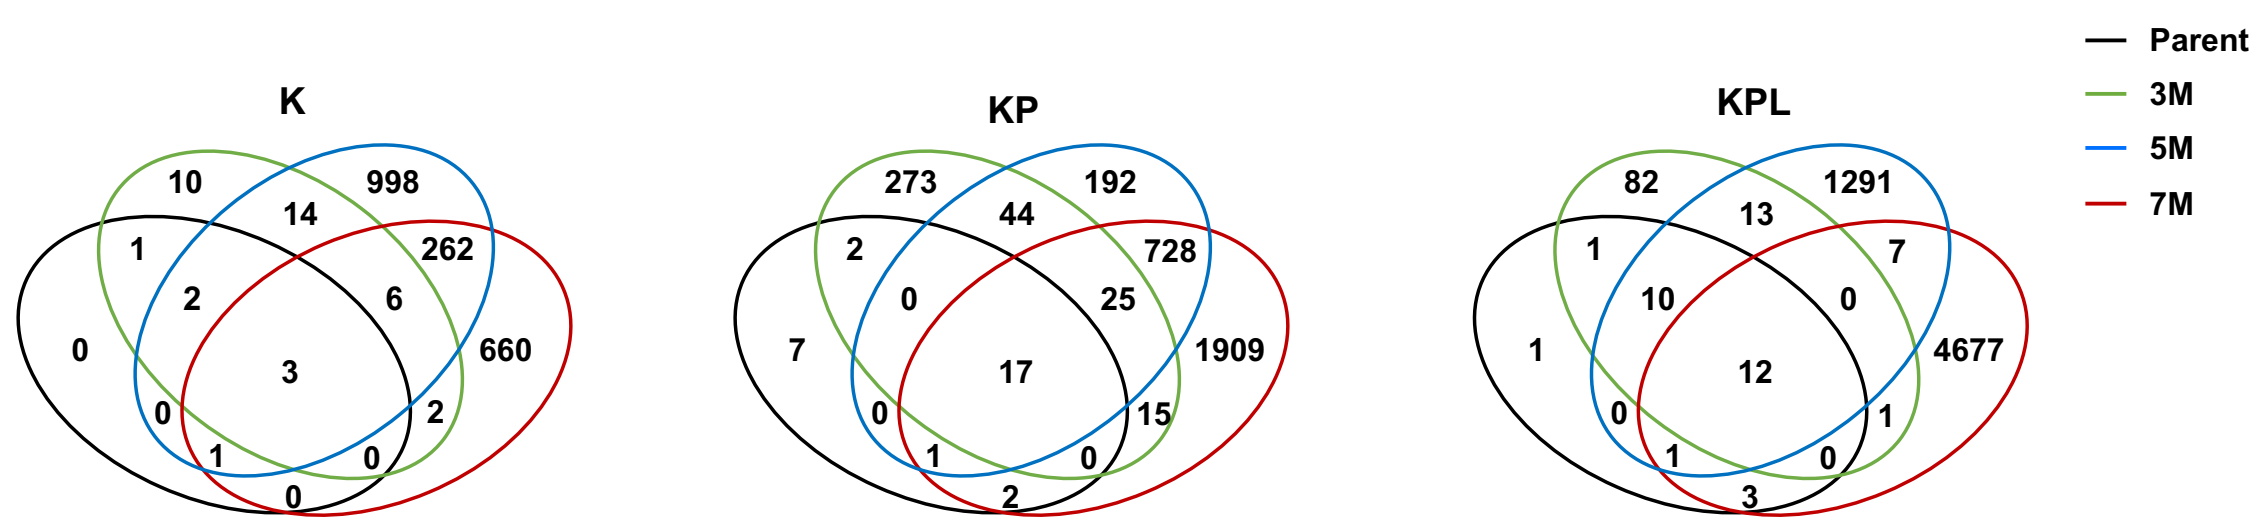

Table S2. Summary of Key Characteristics of *Kras*-Mutant NSCLC Cell Lines.

| Genetic background                                                   | Cell ID | TMB (per Mb) | TME (% of immune cells) |     |        |     |     | Anti-PD-1 Efficacy |
|----------------------------------------------------------------------|---------|--------------|-------------------------|-----|--------|-----|-----|--------------------|
|                                                                      |         |              | CD4                     | CD8 | G-MDSC | TAM | DC  |                    |
| <i>Kras</i> <sup>G12D</sup> (K)                                      | Parent  | 0.67         | 5%                      | 6%  | 38%    | 7%  | 4%  | Modest             |
|                                                                      | 3M      | 3.18         | 4%                      | 11% | 32%    | 6%  | 4%  | Robust             |
| <i>Kras</i> <sup>G12DP53<sup>-/-</sup></sup> (KP)                    | Parent  | 1.71         | 2%                      | <1% | 15%    | 7%  | 4%  | Resistant          |
|                                                                      | 3M      | 22.13        | 4%                      | 3%  | 14%    | 6%  | 5%  | Robust             |
| <i>Kras</i> <sup>G12DP53<sup>-/-</sup>LKB1<sup>-/-</sup></sup> (KPL) | Parent  | 1.75         | <1%                     | <1% | 95%    | <1% | <1% | Resistant          |
|                                                                      | 3M      | 7.22         | 2%                      | 1%  | 84%    | 4%  | <1% | Modest             |
|                                                                      | 5M      | 81.67        | 3%                      | 2%  | 84%    | 4%  | <1% | Robust             |
